# Supplementary material for: Efficient and stable perovskite solar cells using manganese-doped nickel oxide as the hole transport layer
Source: Royal Society of Chemistry journal article supplement (doi:10.1039/d2ra03411e), 2022-01-01
Supplement: d2ra03411e1.pdf [file d2ra03411e1.pdf]

## Supporting Information

### Efficient and stable perovskite solar cells using manganese-doped nickel oxide as the hole transport layer

You-Wei Wu, Chih-Yu Chang, Fu-Bing Chiu, and Sheng-Hsiung Yang\*

*Institute of Lighting and Energy Photonics, College of Photonics, National Yang Ming Chiao Tung University, No.301, Section 2, Gaofa 3<sup>rd</sup> Road, Guiren District, Tainan 71150, Taiwan R.O.C.*

\*Correspondence: [yangsh@nycu.edu.tw](mailto:yangsh@nycu.edu.tw)

Table S1. Lifetime parameters of TR-PL decay curves of the perovskite on the FTO substrate, pristine or Mn-doped NiO<sub>x</sub> films with different doping concentration of 0.5–2 mol%.

| Substrate                          | A <sub>1</sub> (%) | τ <sub>1</sub> (ns) | A <sub>2</sub> (%) | τ <sub>2</sub> (ns) | τ <sub>avg</sub> (ns) |
|------------------------------------|--------------------|---------------------|--------------------|---------------------|-----------------------|
| FTO                                | 50.69              | 16.0742             | 49.31              | 103.017             | 90.9995               |
| Pristine NiO <sub>x</sub>          | 57.48              | 10.2197             | 42.52              | 62.2092             | 52.7601               |
| 0.5 mol% Mn-doped NiO <sub>x</sub> | 56.75              | 9.281               | 43.25              | 40.40               | 33.1997               |
| 1 mol% Mn-doped NiO <sub>x</sub>   | 59.69              | 9.3006              | 40.31              | 46.26               | 37.7809               |
| 2 mol% Mn-doped NiO <sub>x</sub>   | 61.95              | 9.29854             | 38.05              | 61.7108             | 51.3829               |

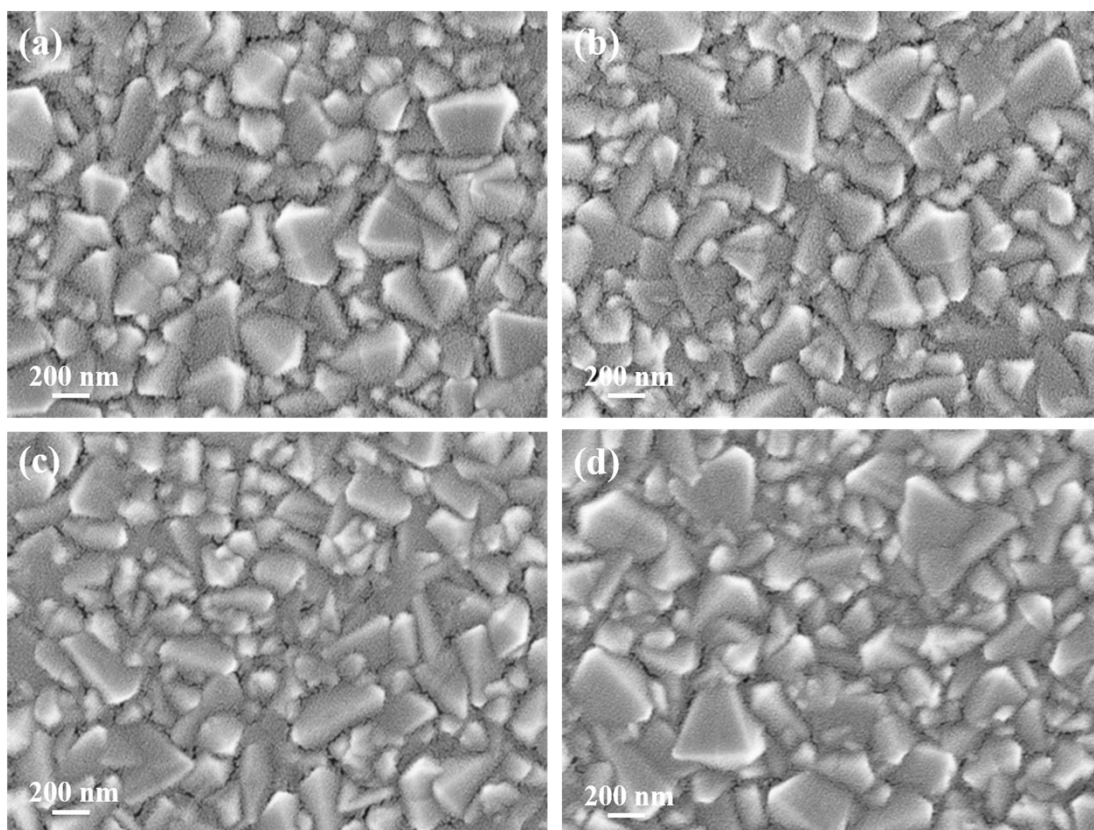

**Figure S1.** Top-view SEM images of the pristine and Mn-doped NiO<sub>x</sub> films with different doping concentration of (a) 0, (b) 0.5, (c) 1, and (d) 2 mol%.

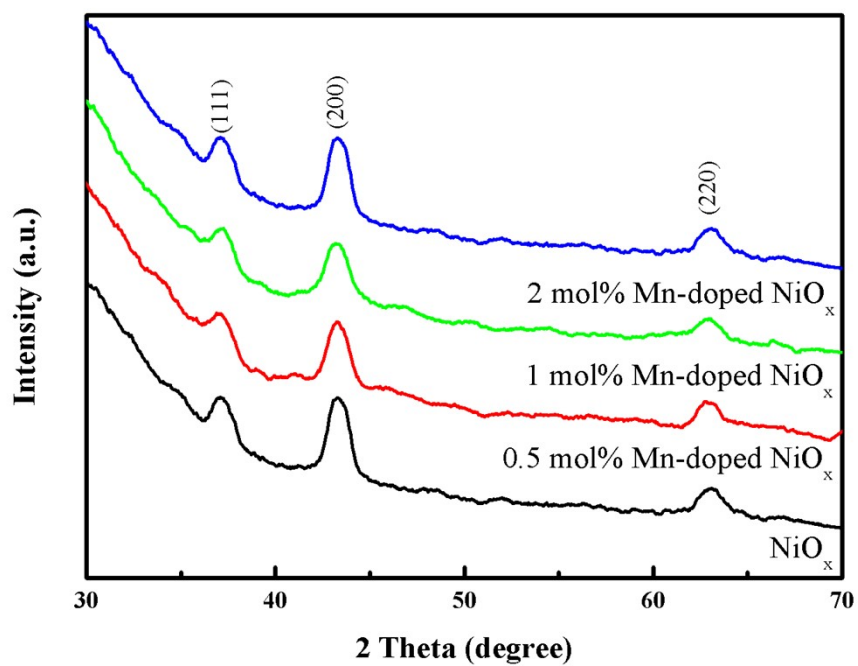

**Figure S2.** XRD patterns of the pristine and Mn-doped NiO<sub>x</sub> films with different doping concentration of 0.5–2 mol%.

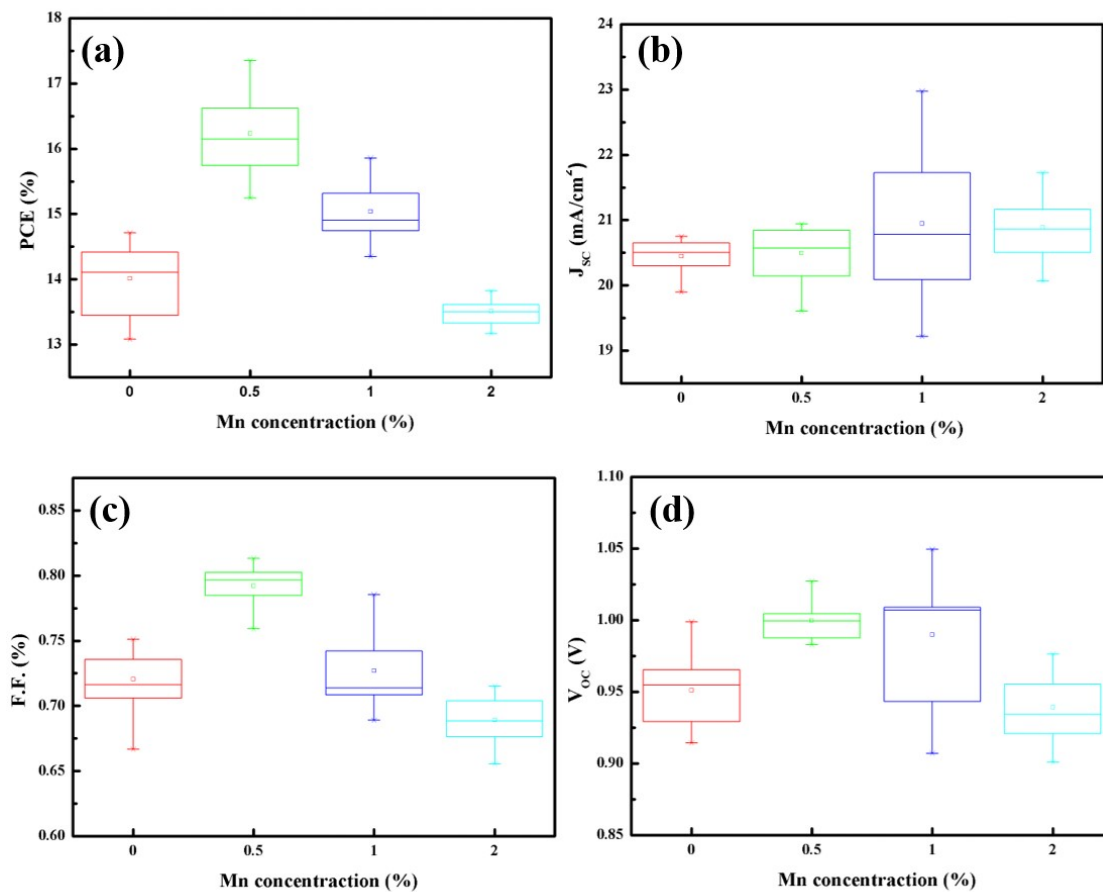

**Figure S3.** Performance variation represented as a standard box plot in (a) *PCE*, (b) *J<sub>sc</sub>*, (c) *FF*, and (d) *V<sub>oc</sub>* from 20 devices based on the pristine and Mn-doped NiO<sub>x</sub> films with different doping concentration of 0.5–2 mol%.
